# Supplementary material for: Differential histone acetylation and super-enhancer regulation underlie melanoma cell dedifferentiation
Source: PubMed Central journal article supplement (PMC11063936; doi:10.1172/jci.insight.166611), 2024-02-06

Figure 3A  
H3K27ac

H3K27ac→

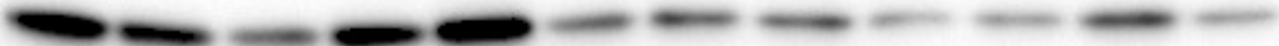

Figure 3A  
H3K18ac

H3K18ac →

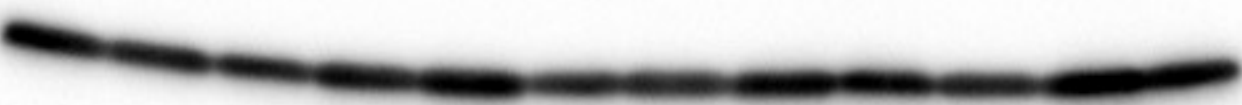

Figure 3A  
H3K9me3

H3K9me3 →

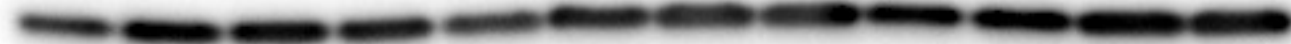

Figure 3A  
H3K9ac

H3K9ac →

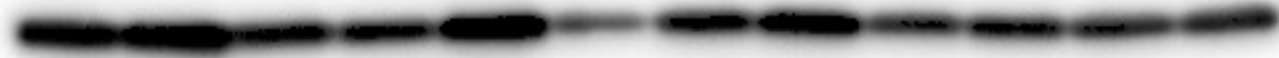

Figure 3A  
H3K4me3

H3K4me3 →

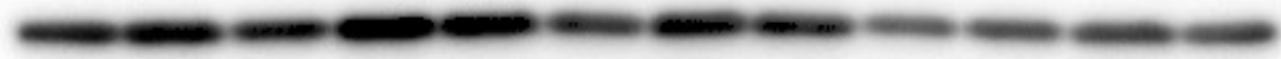

Figure 3A  
H3

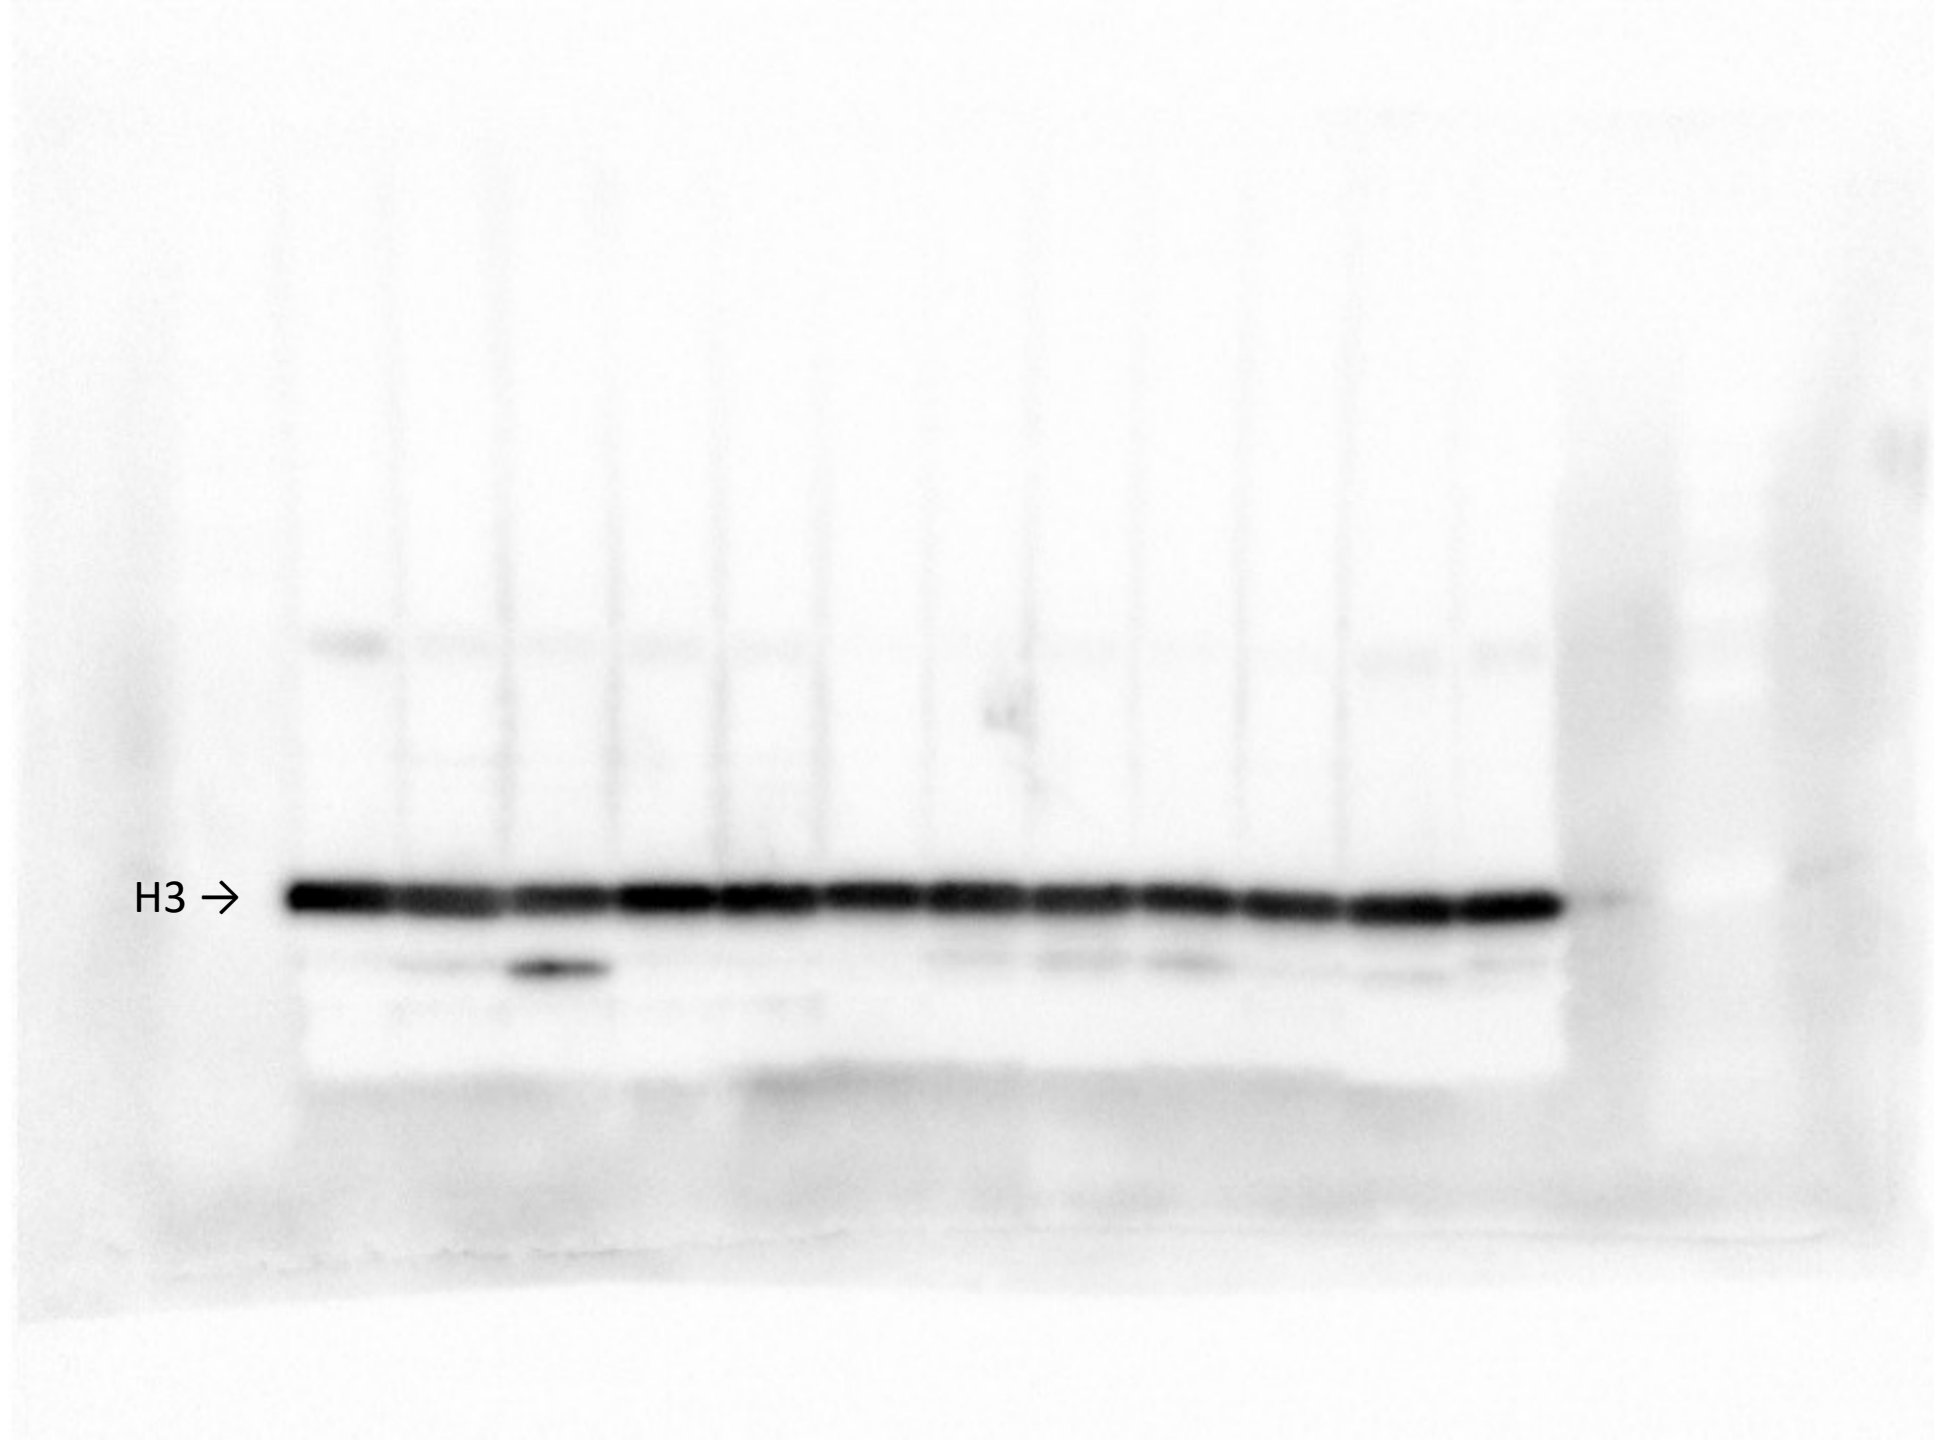

Figure 6C  
ITGA3

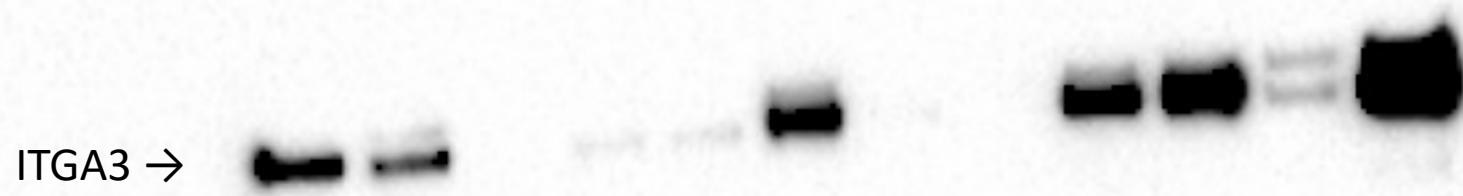

Figure 6C  
MITF

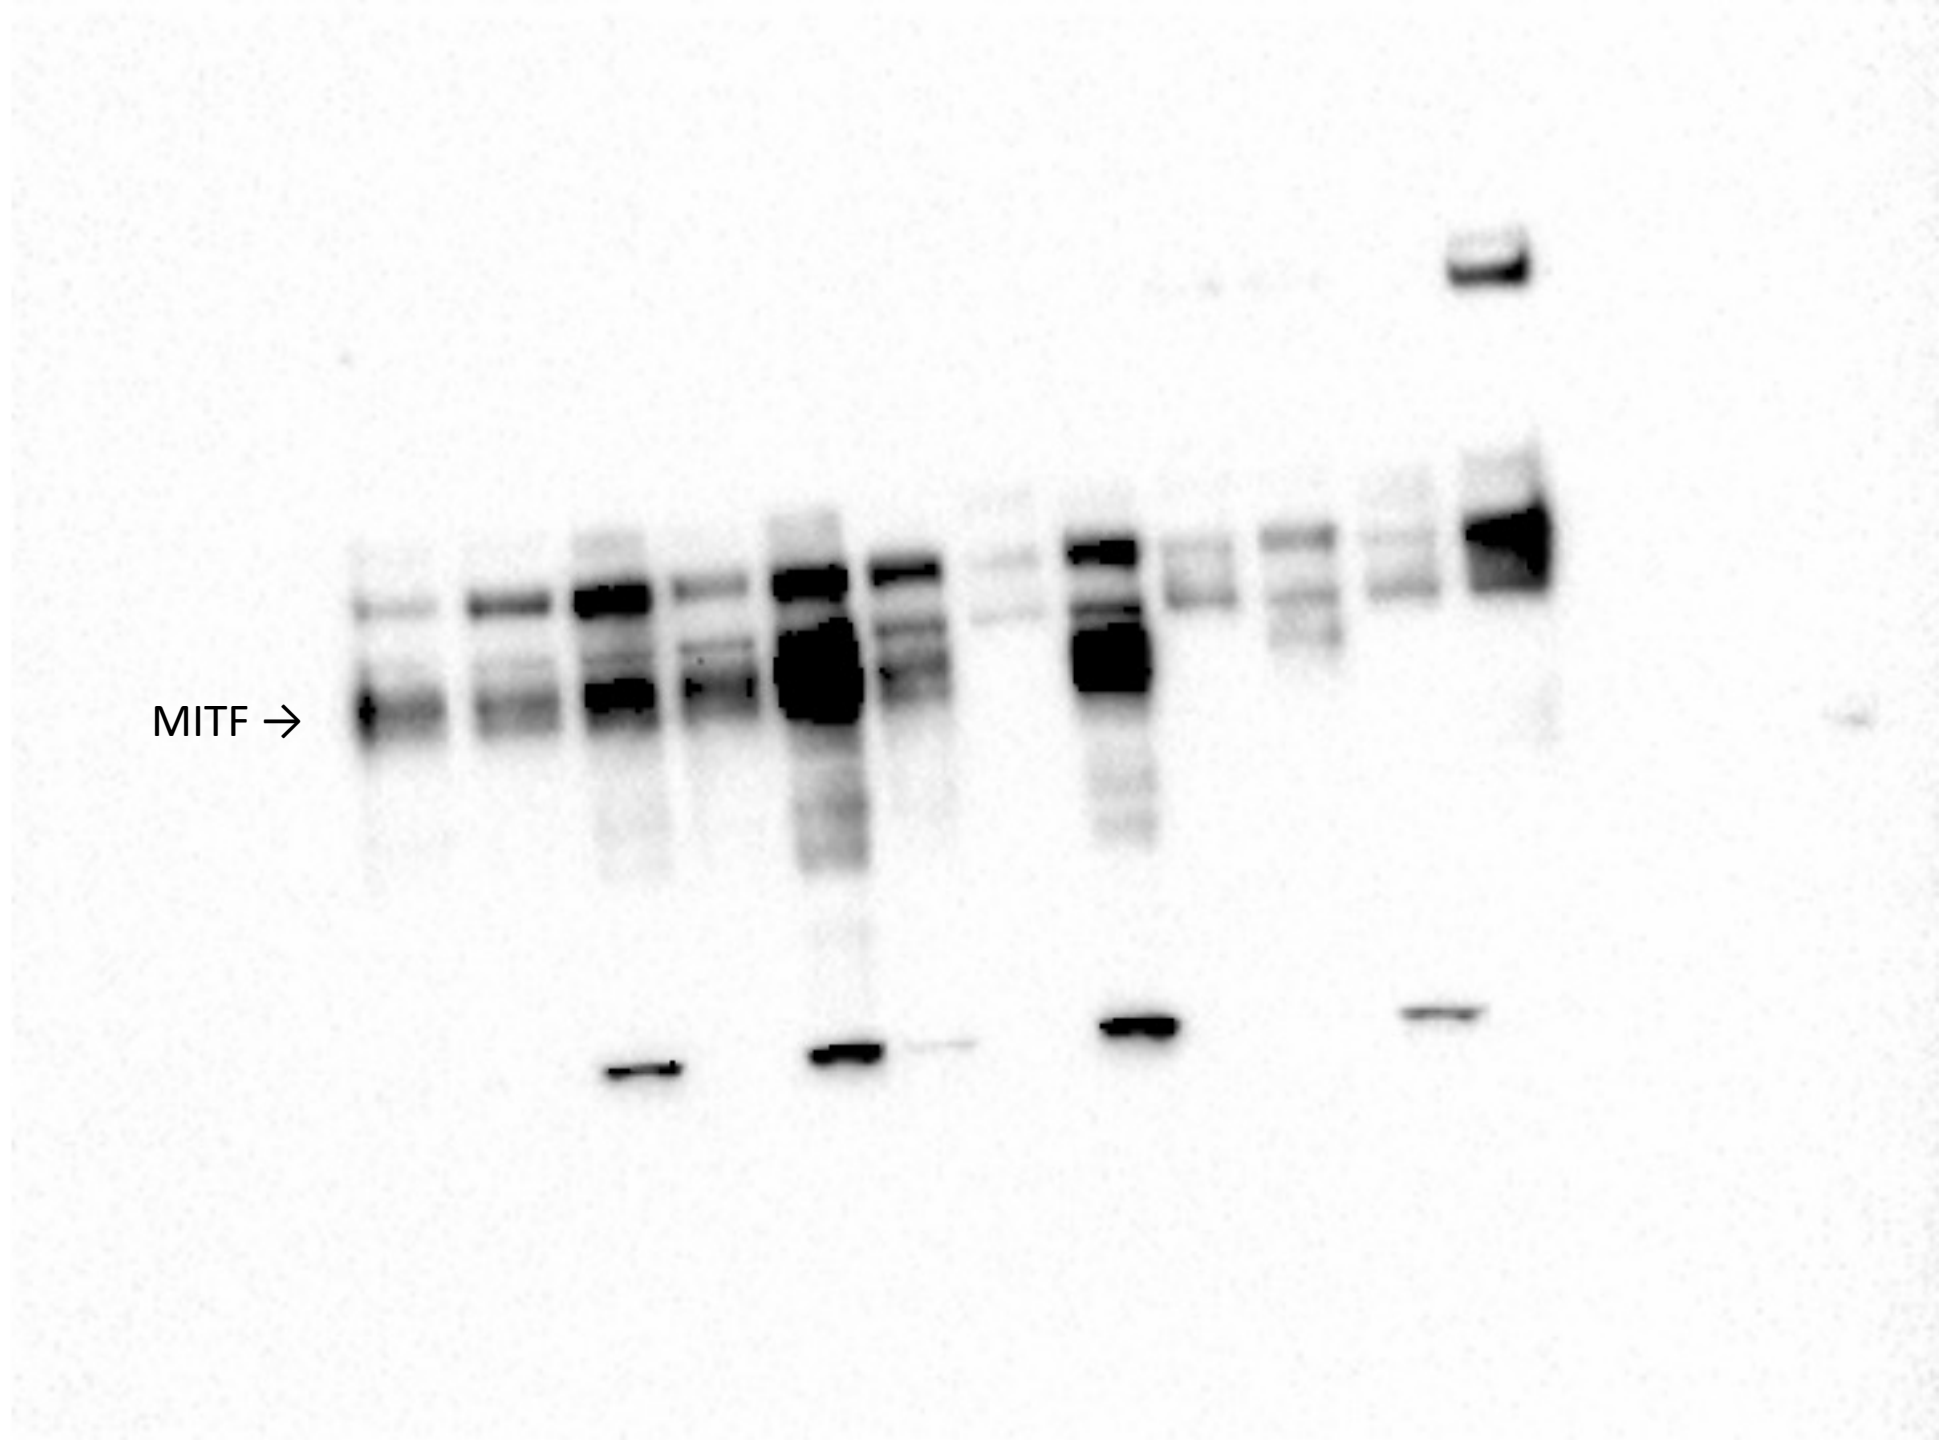



Figure 6C  
Beta-actin

Beta-actin →

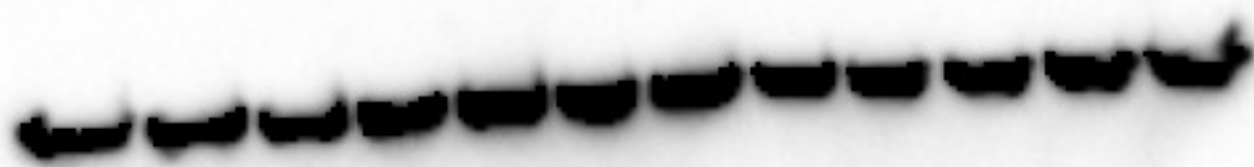

Figure 6D  
ITGA3

ITGA3 →

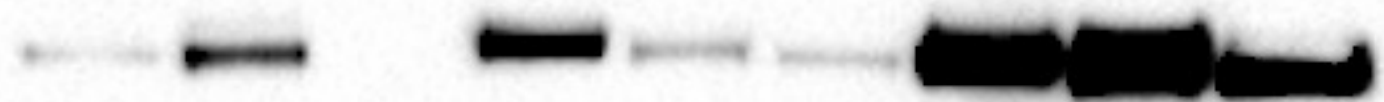

←

Figure 6D  
MITF

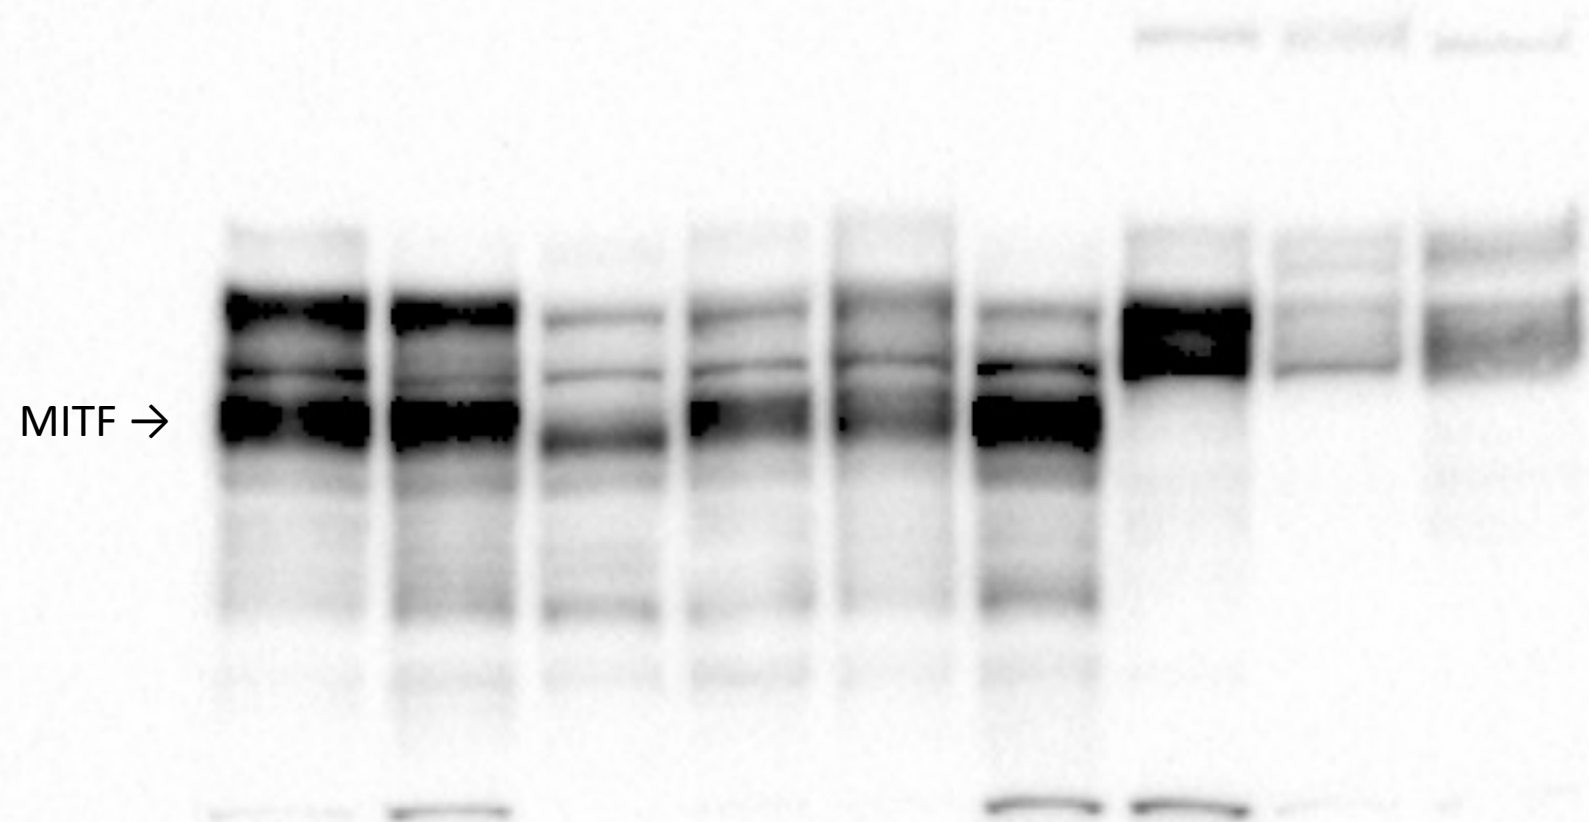

Figure 6D  
Beta-actin

Beta-actin →

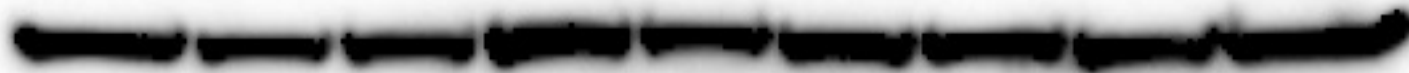

Figure 6E  
ITGA3

ITGA3 →

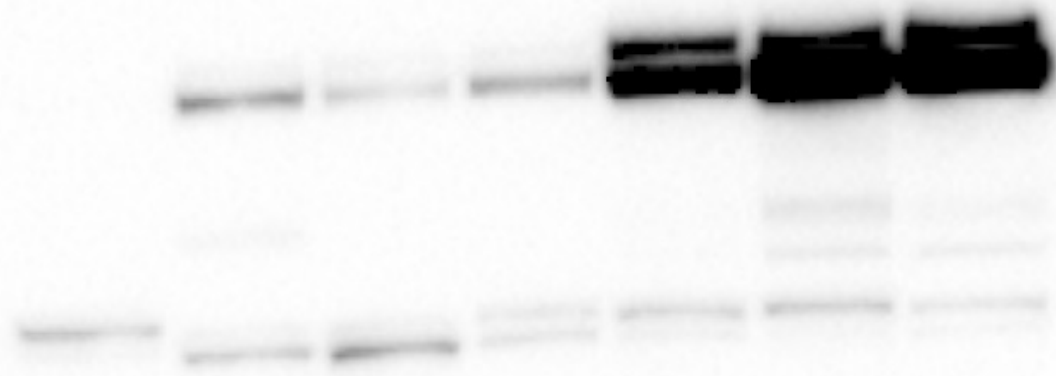

Figure 6E  
MITF

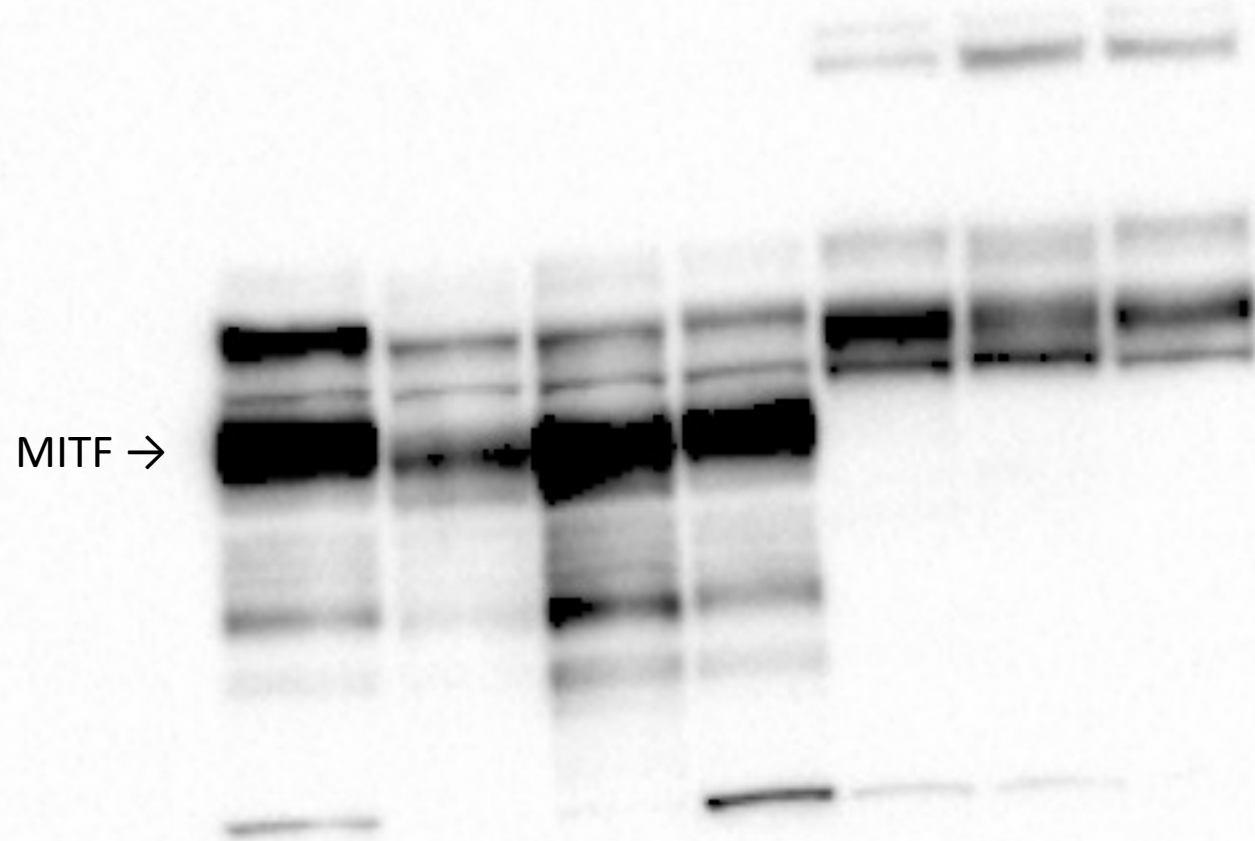

Figure 6E  
Beta-actin

Beta-actin →

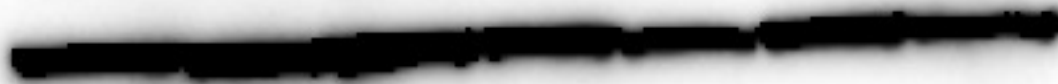

Figure 6F  
ITGA3

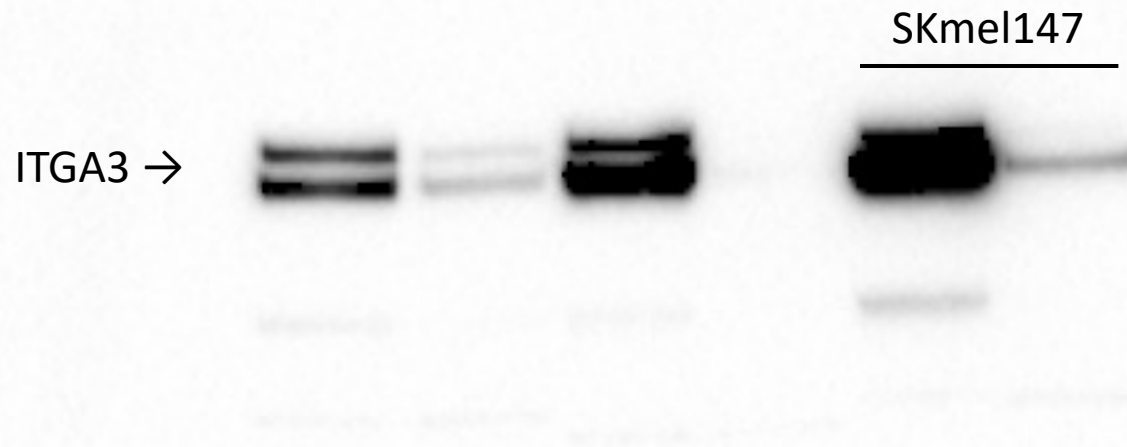



Figure 6F  
Beta-actin

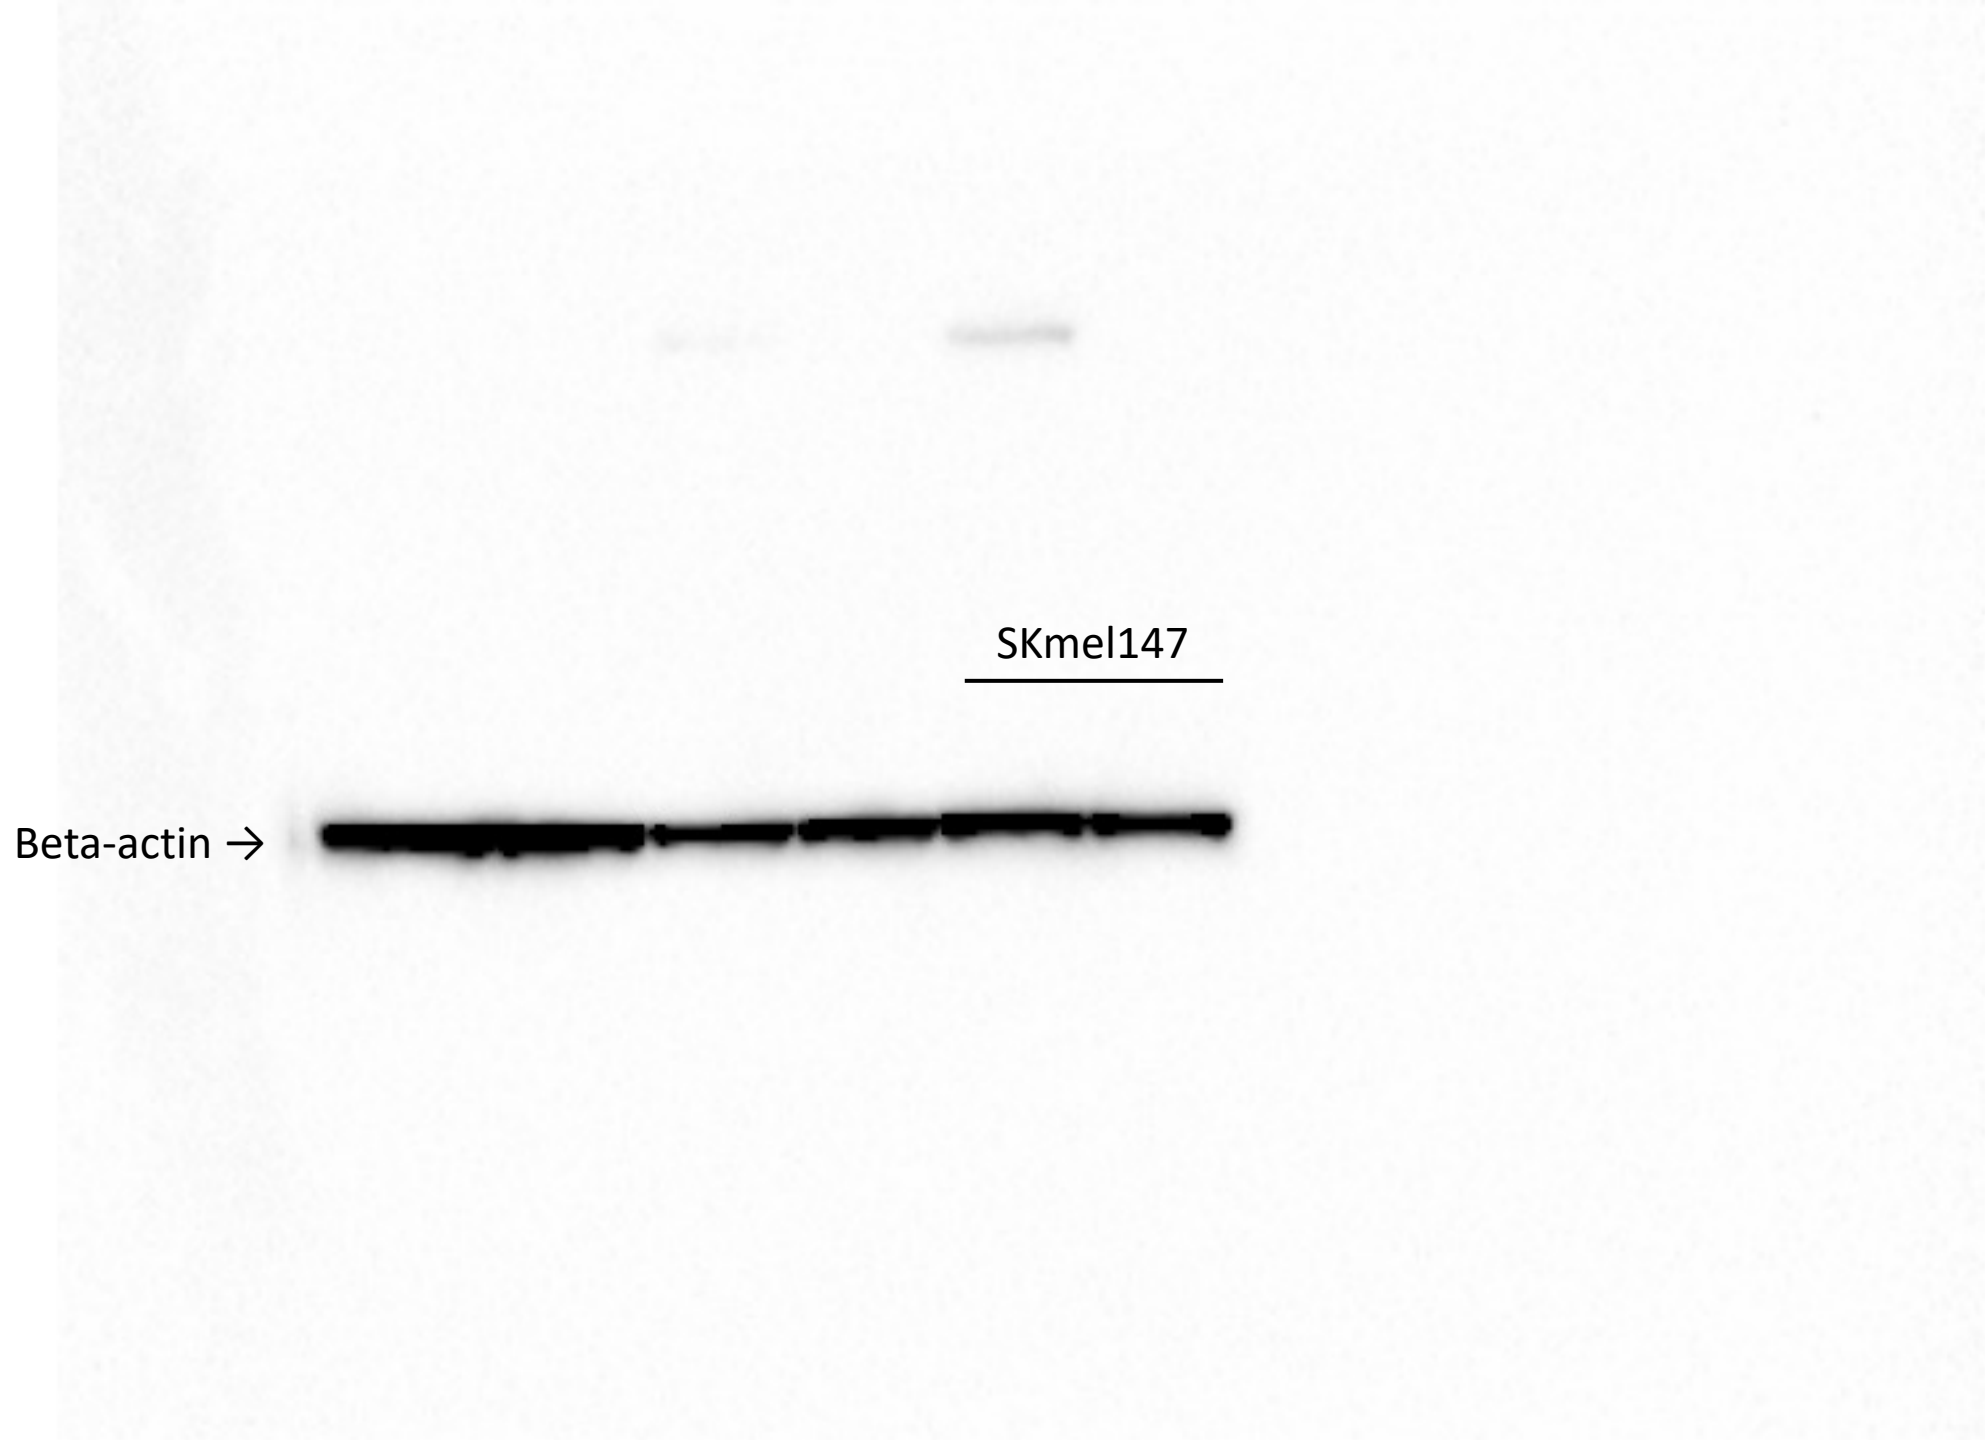

Figure 6G  
ITGA3

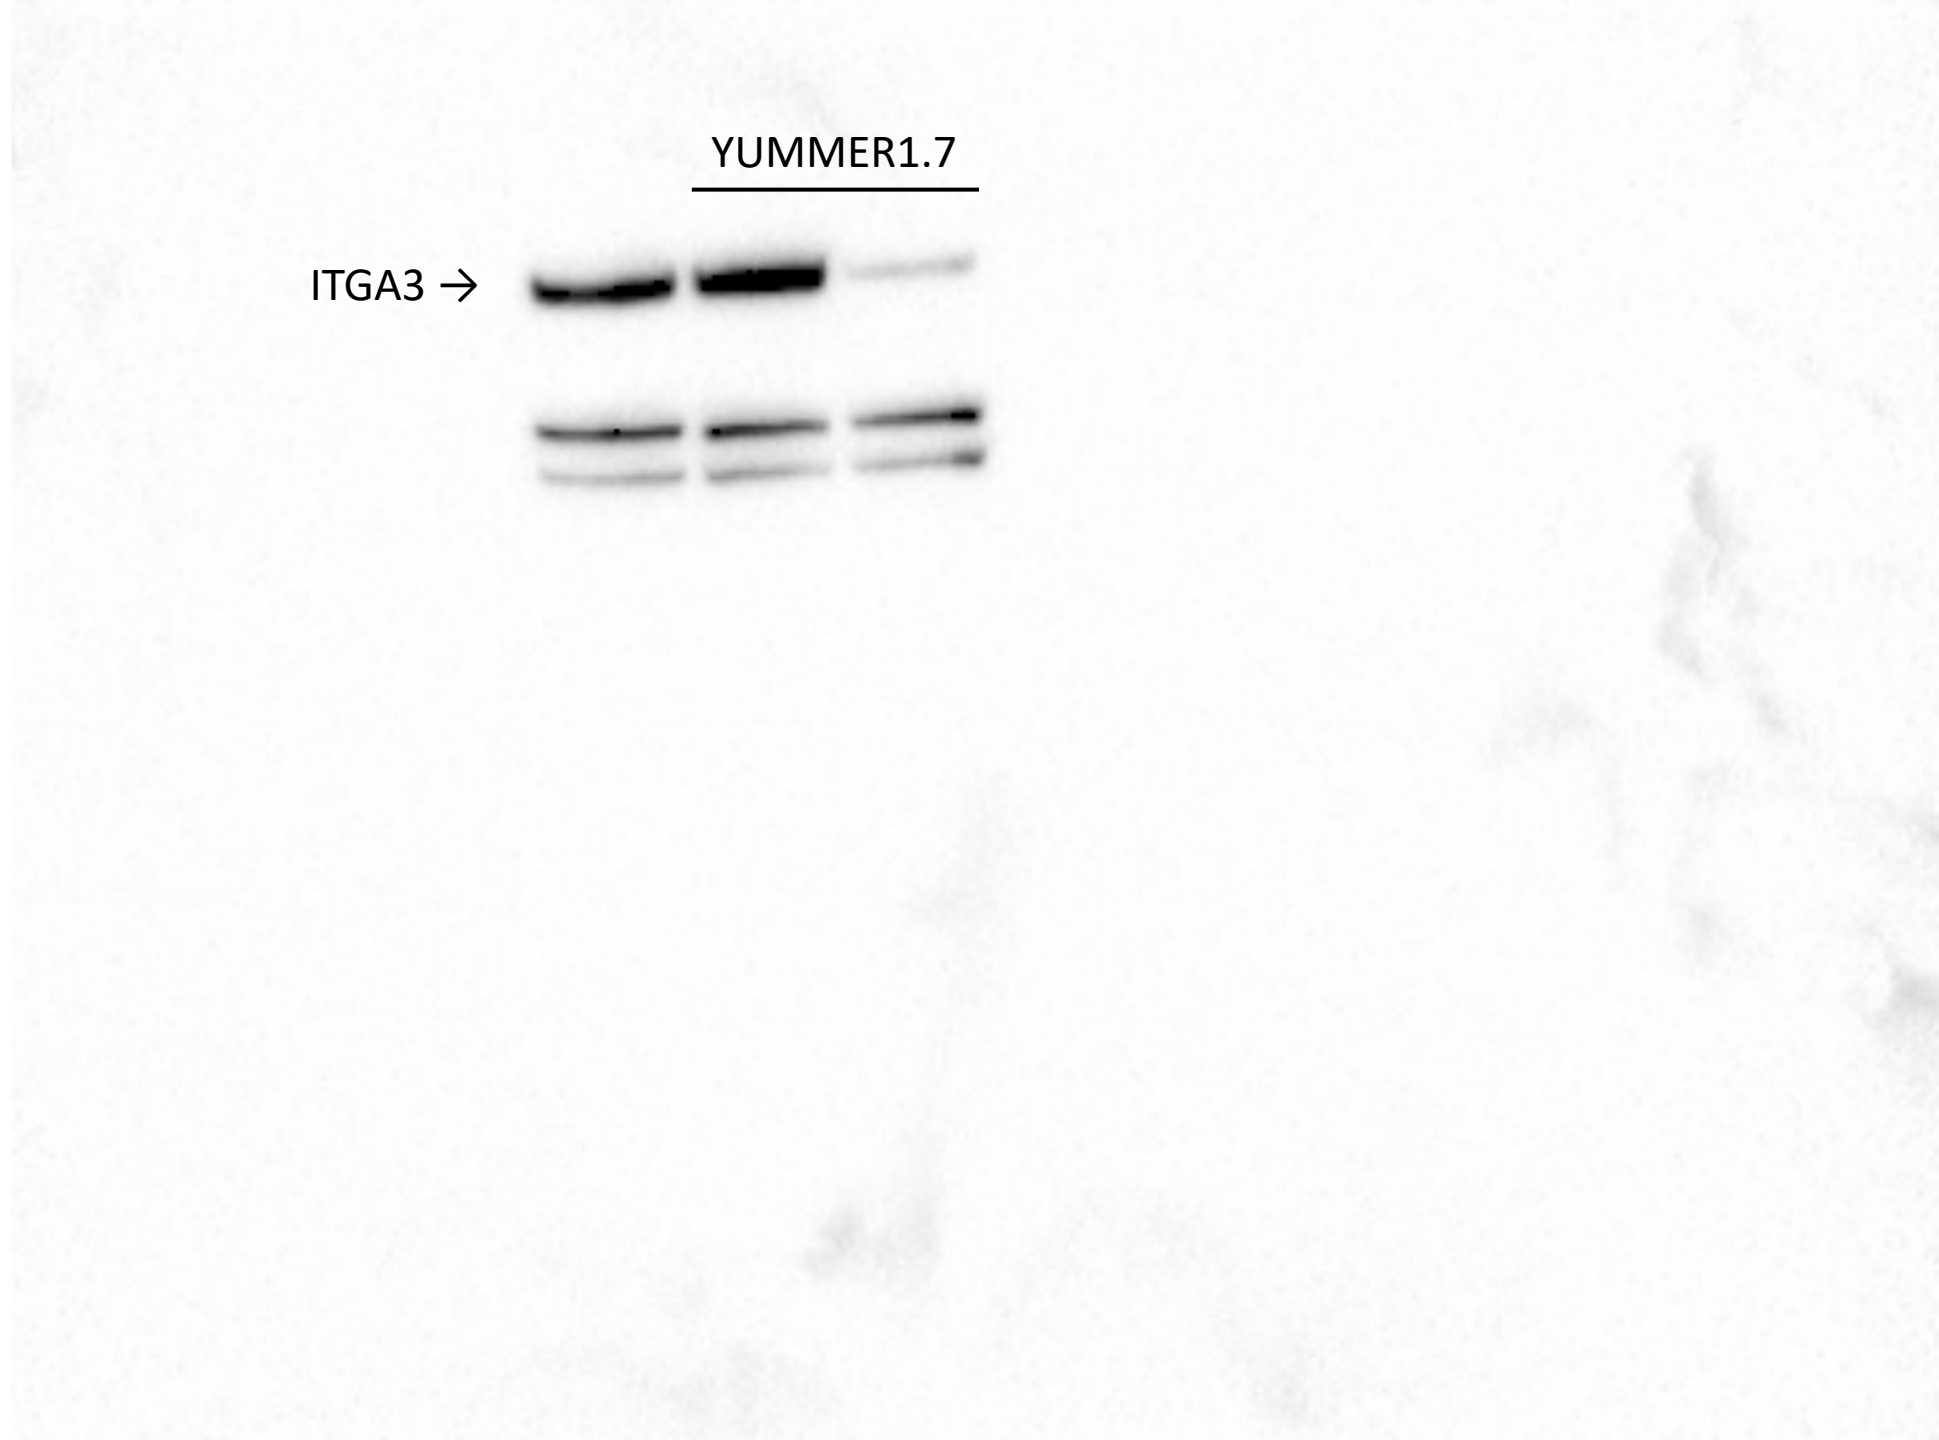

Figure 6G  
Beta-actin

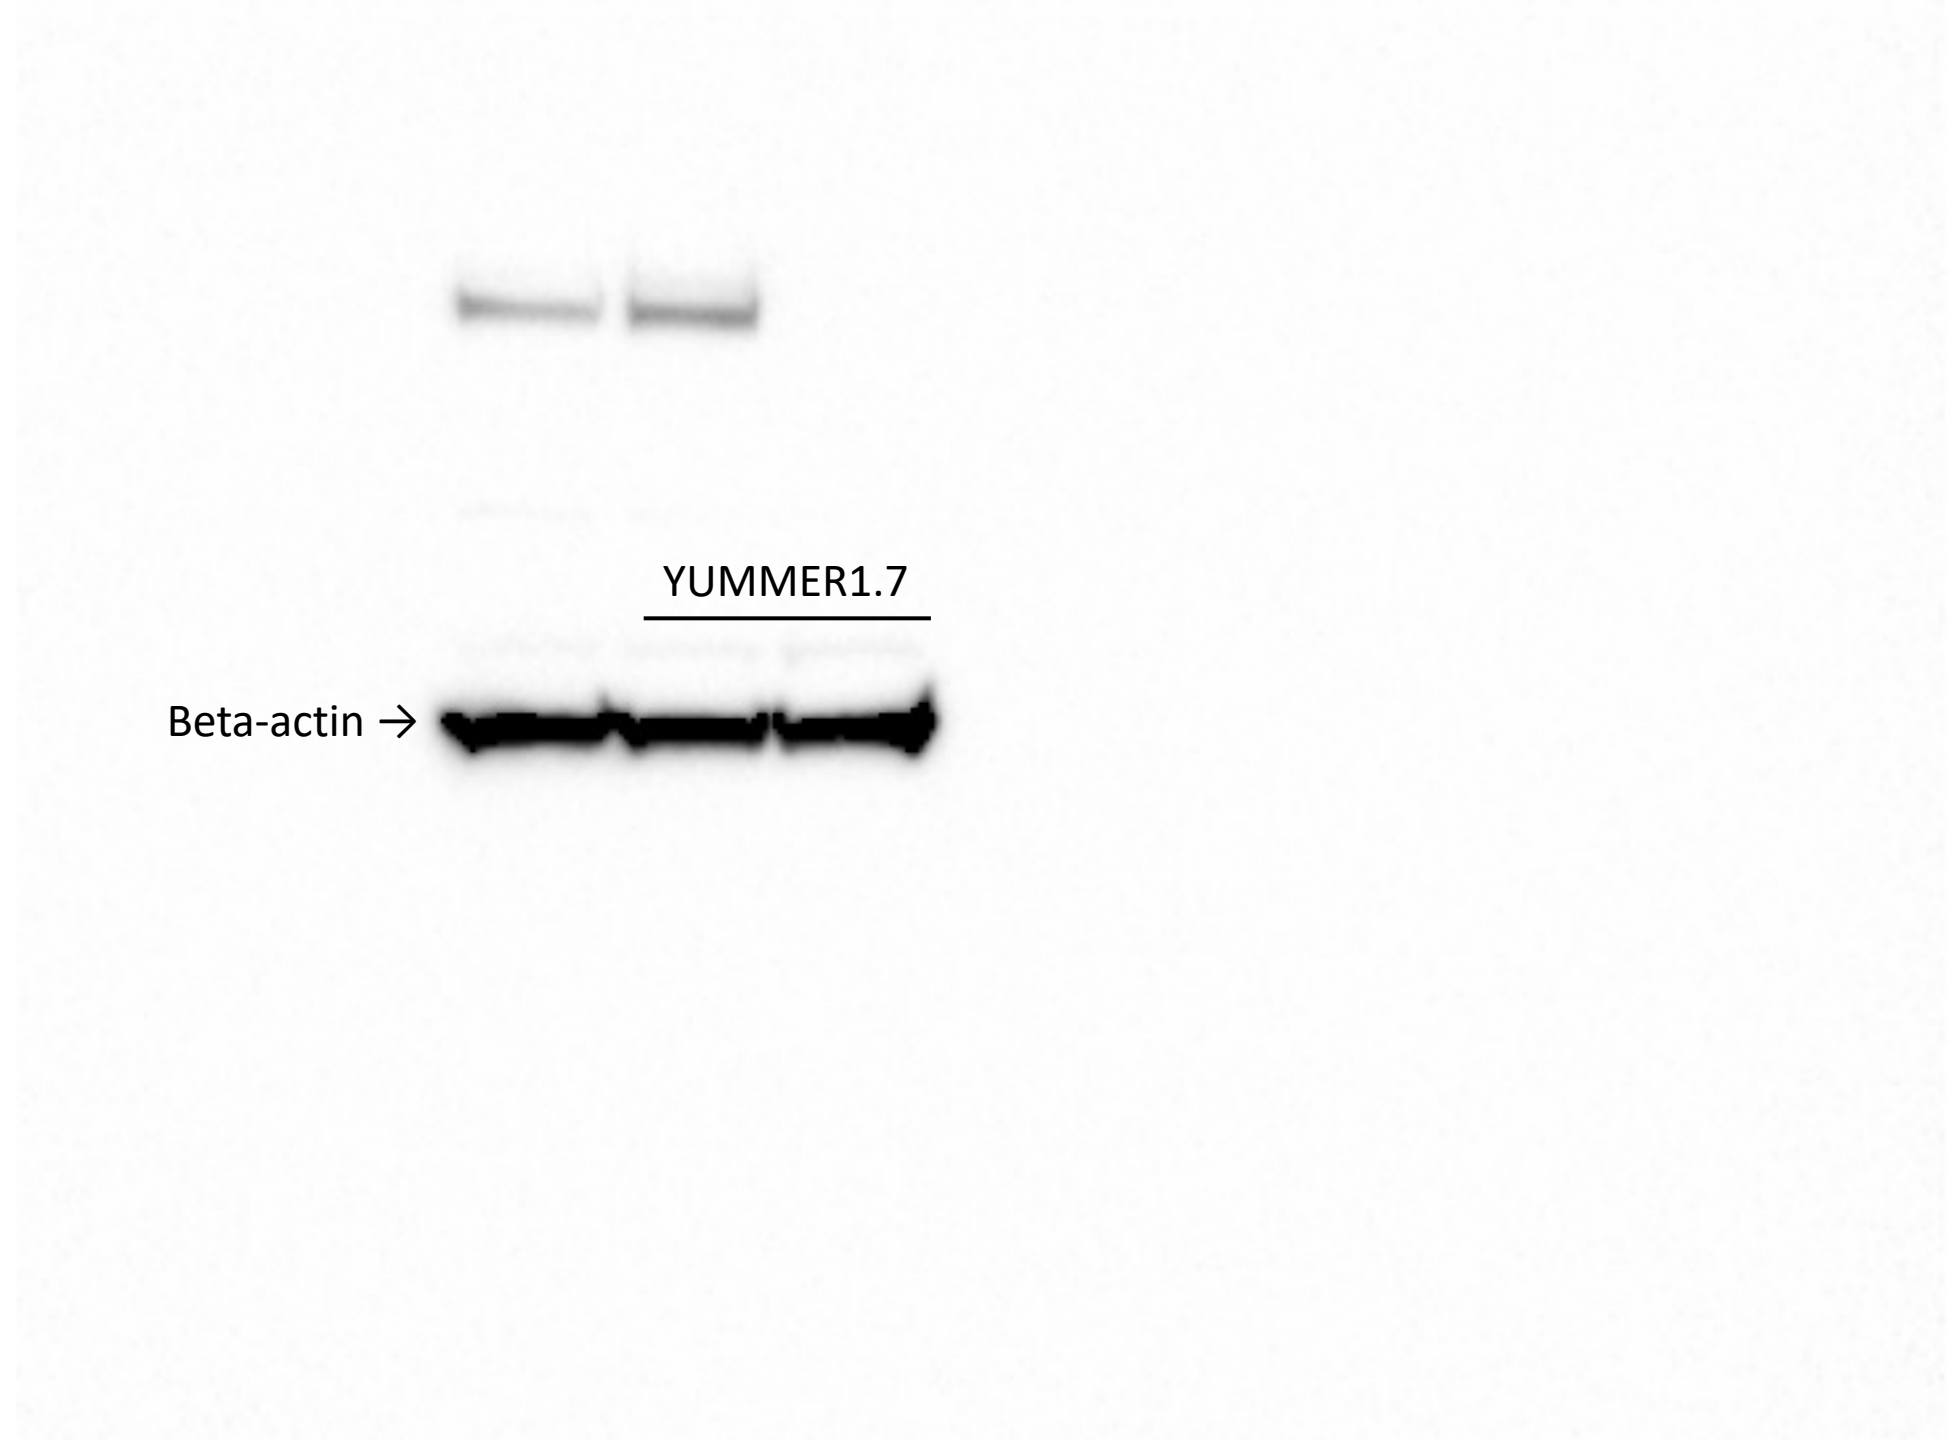

Figure 6H  
ITGA3

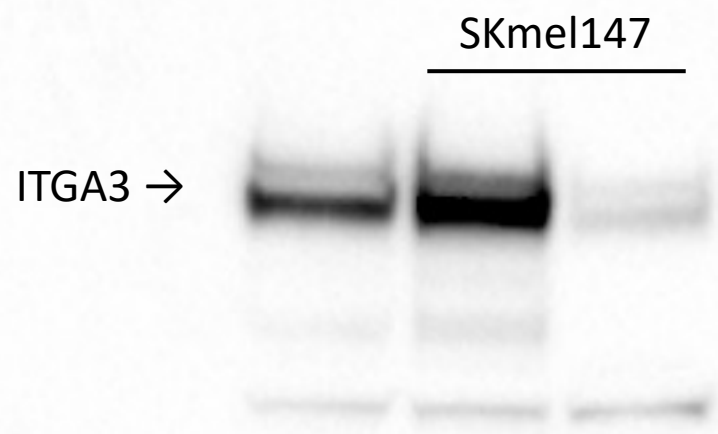

Figure 6H  
Beta-actin

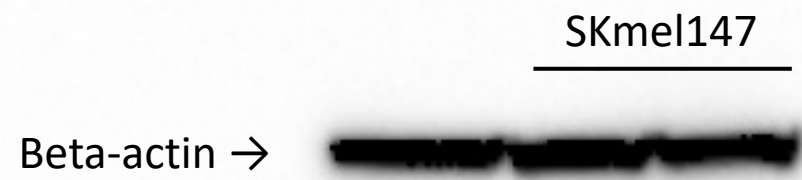

Figure S1C  
MITF

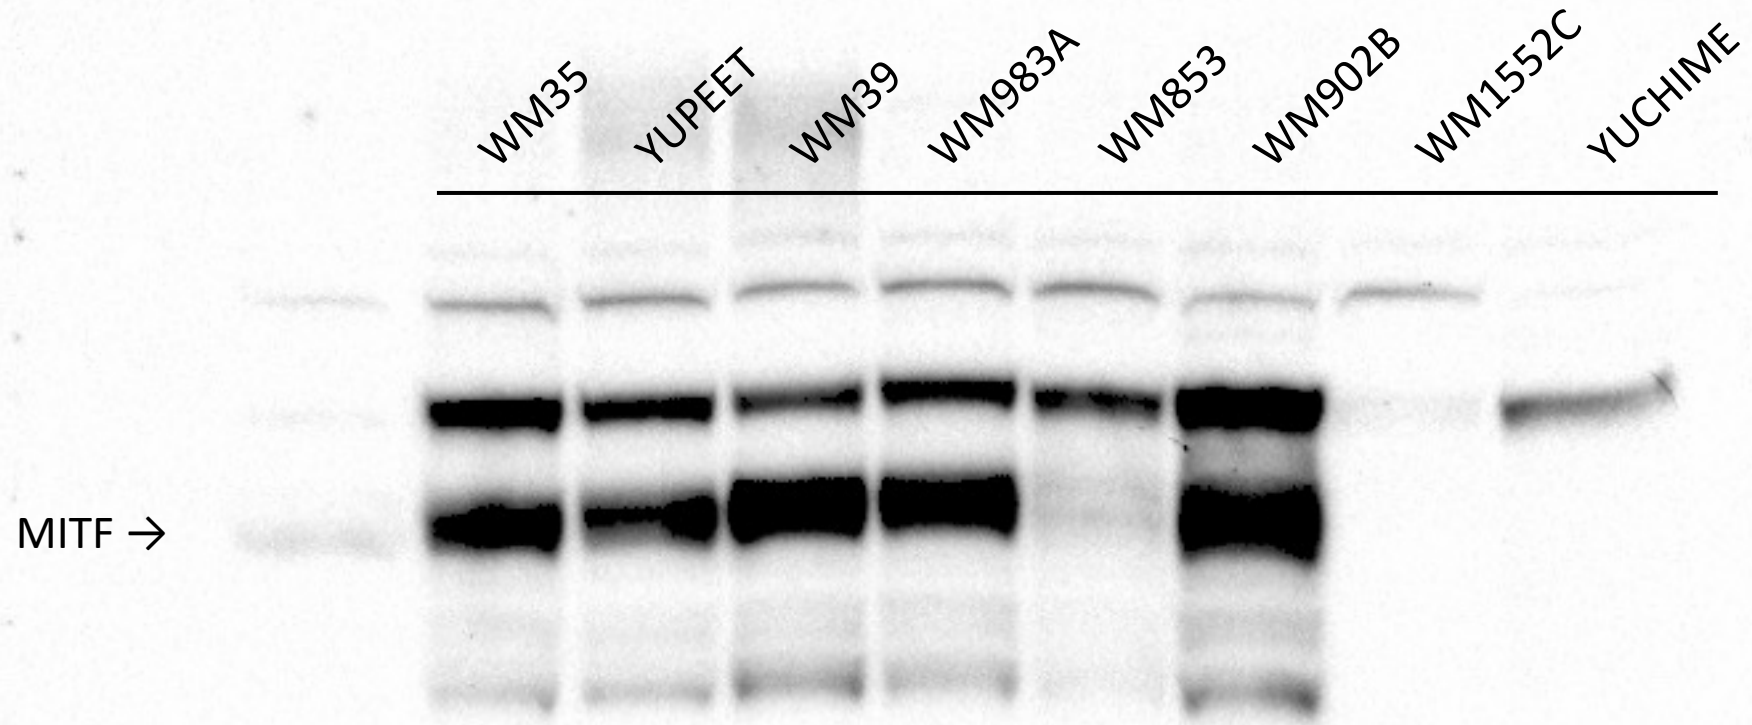

Figure S1C  
Beta-actin

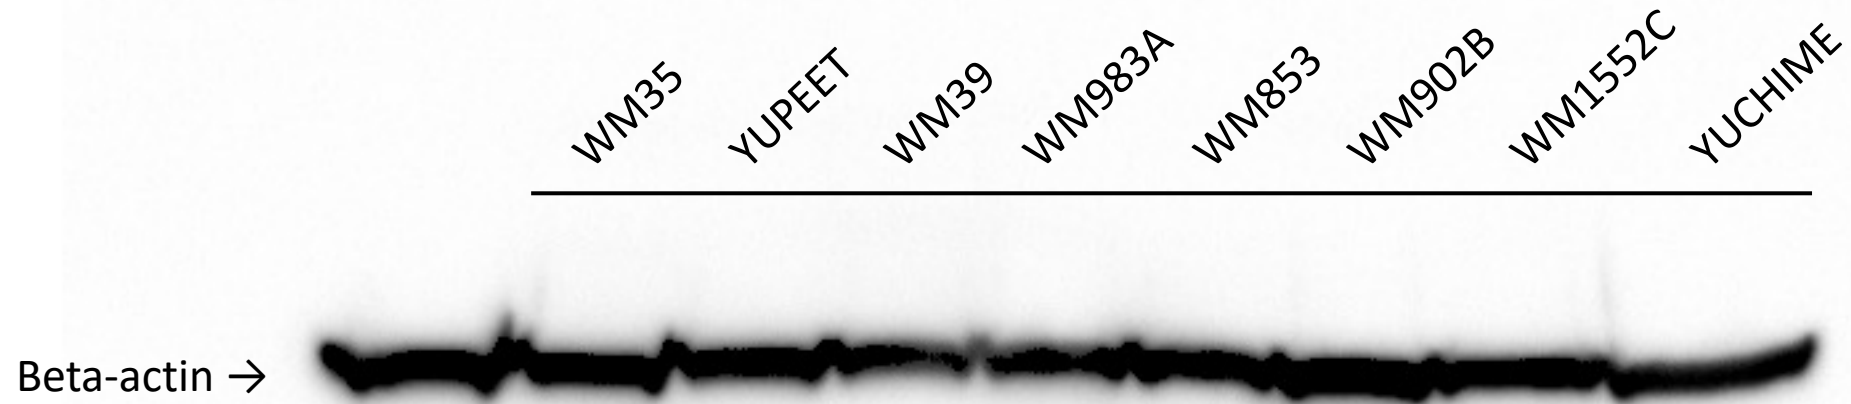

Figure S4  
H3K4me1

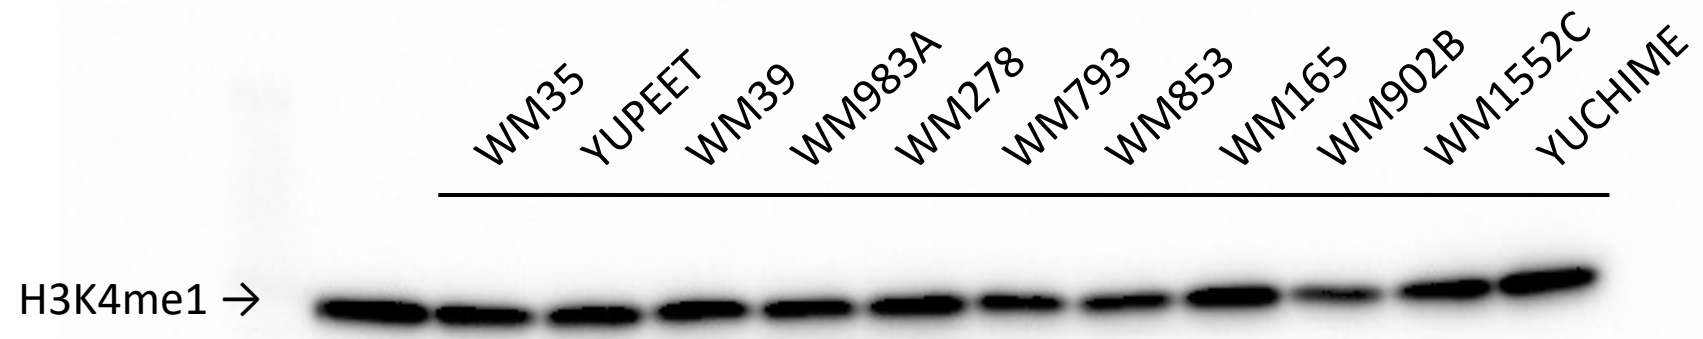



Figure S4  
H3K9me2

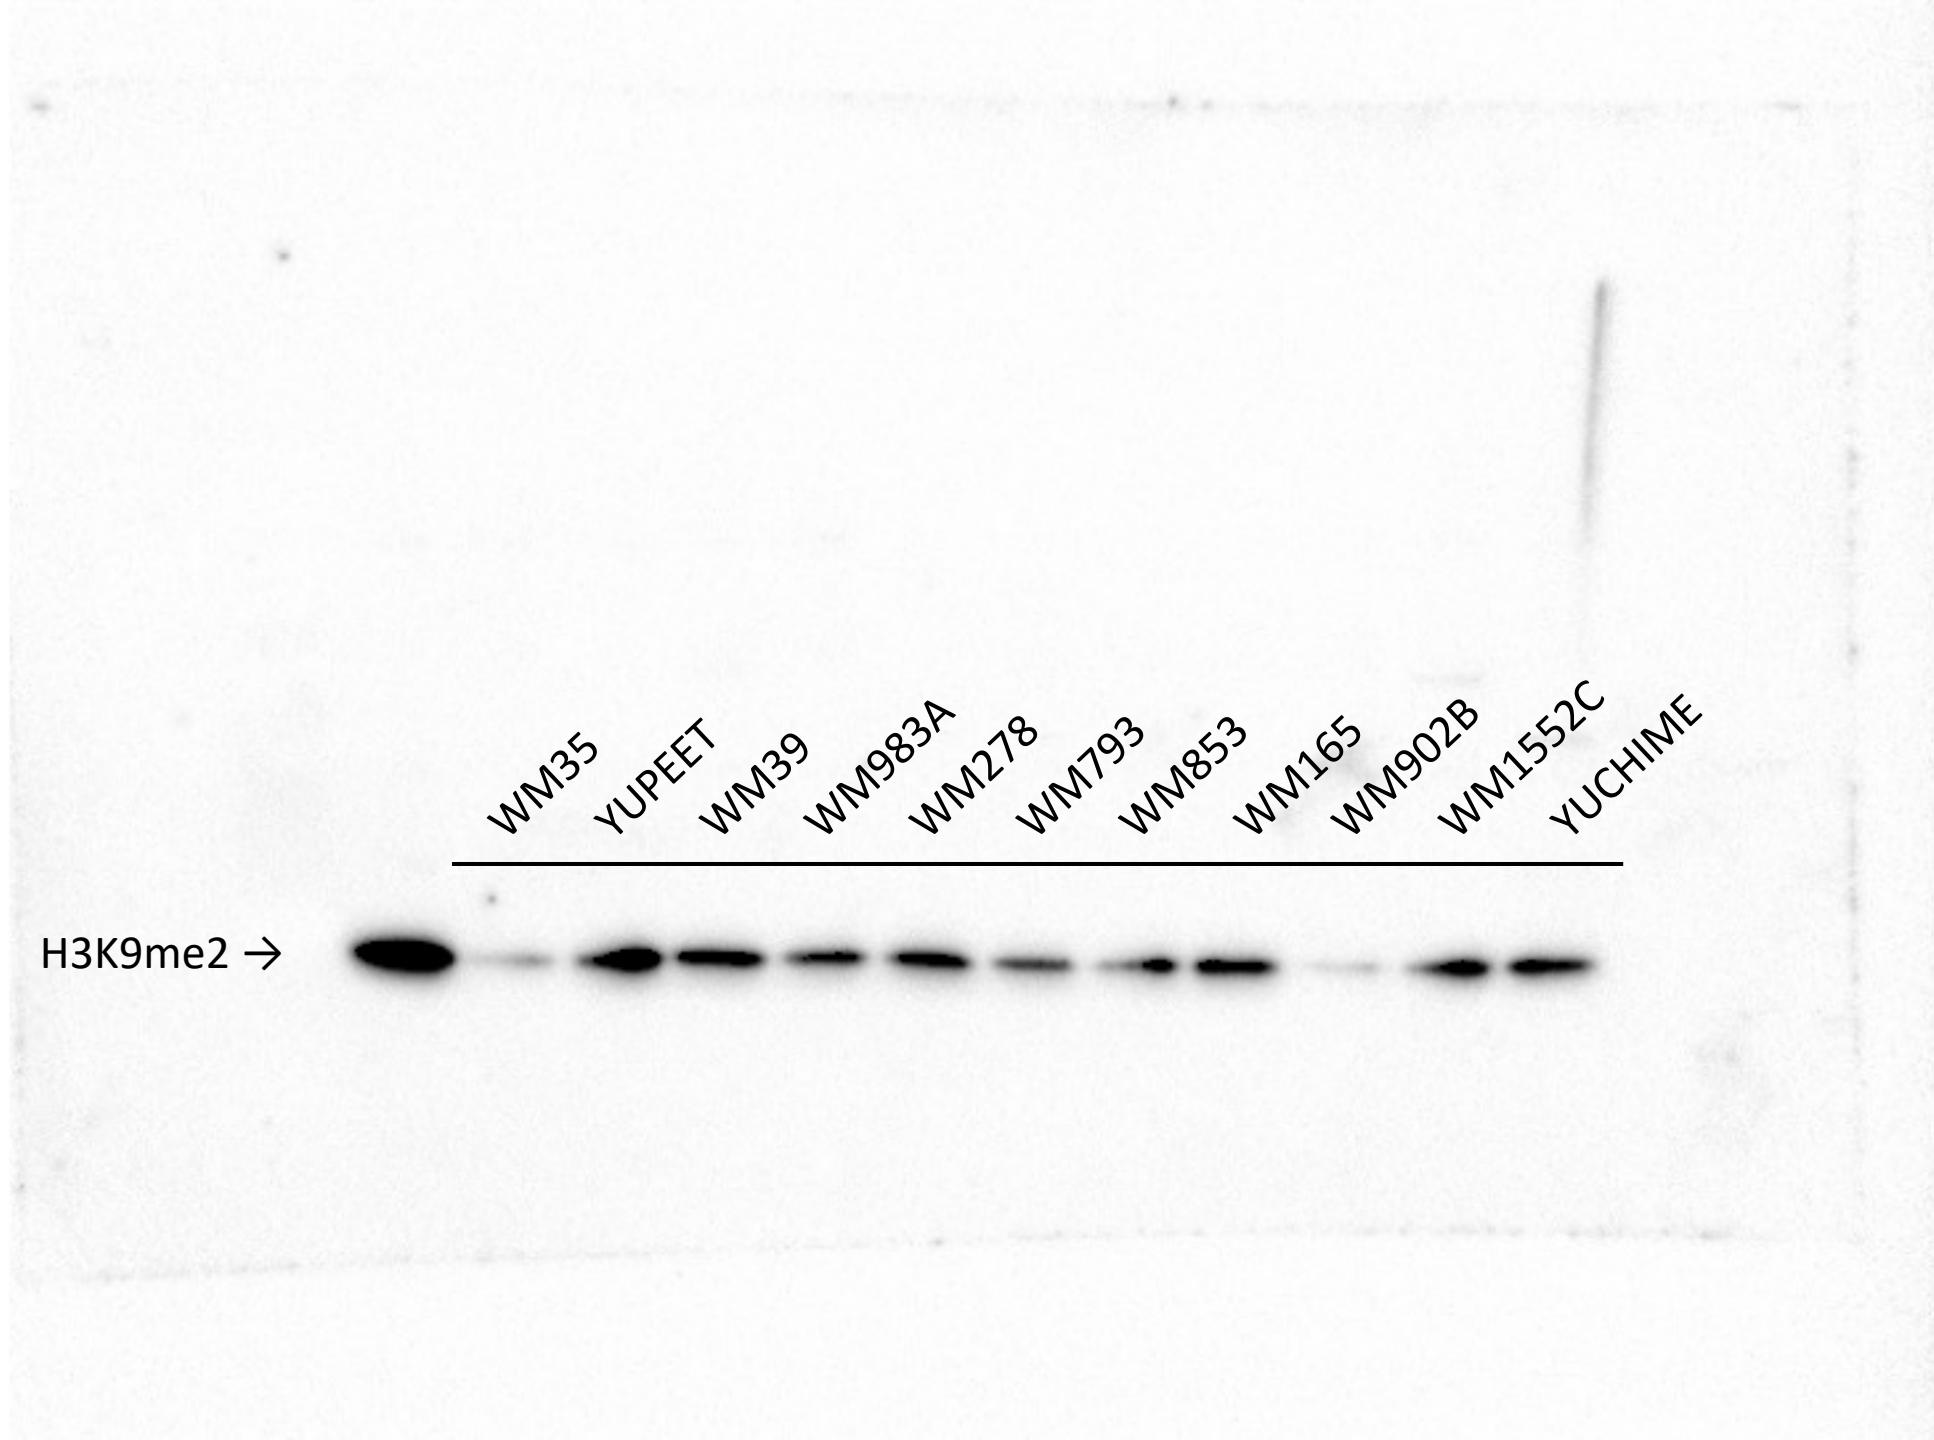

Figure S4  
H3K27me3

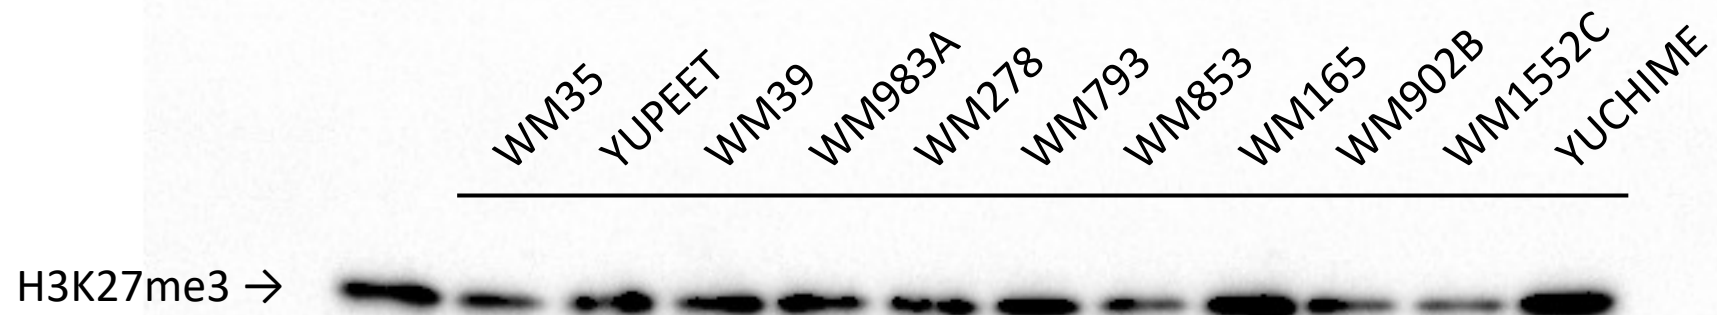

Figure S4  
H3K36me3

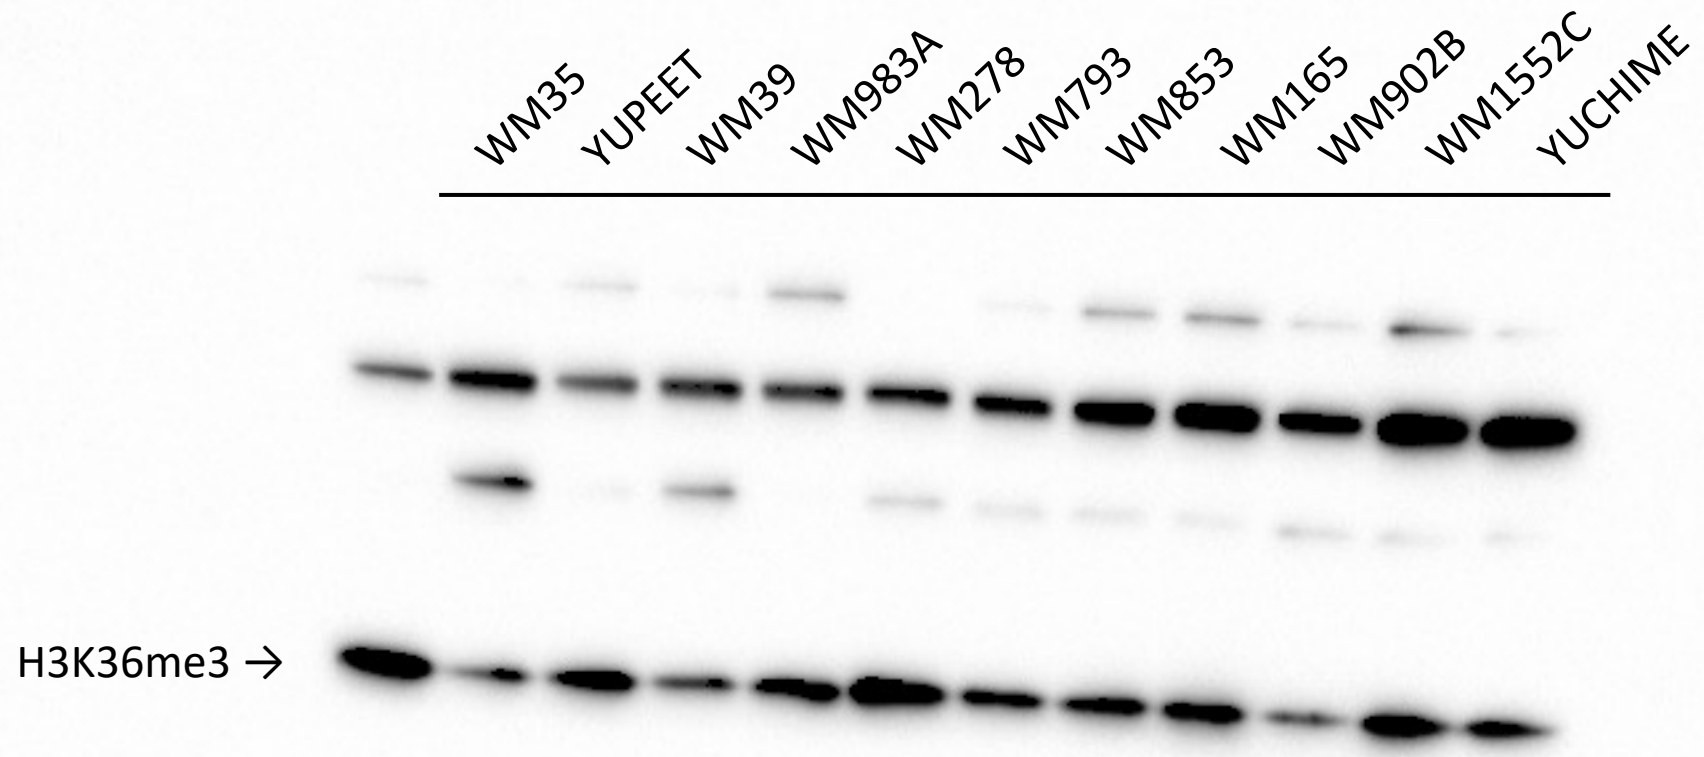

Figure S4  
H3

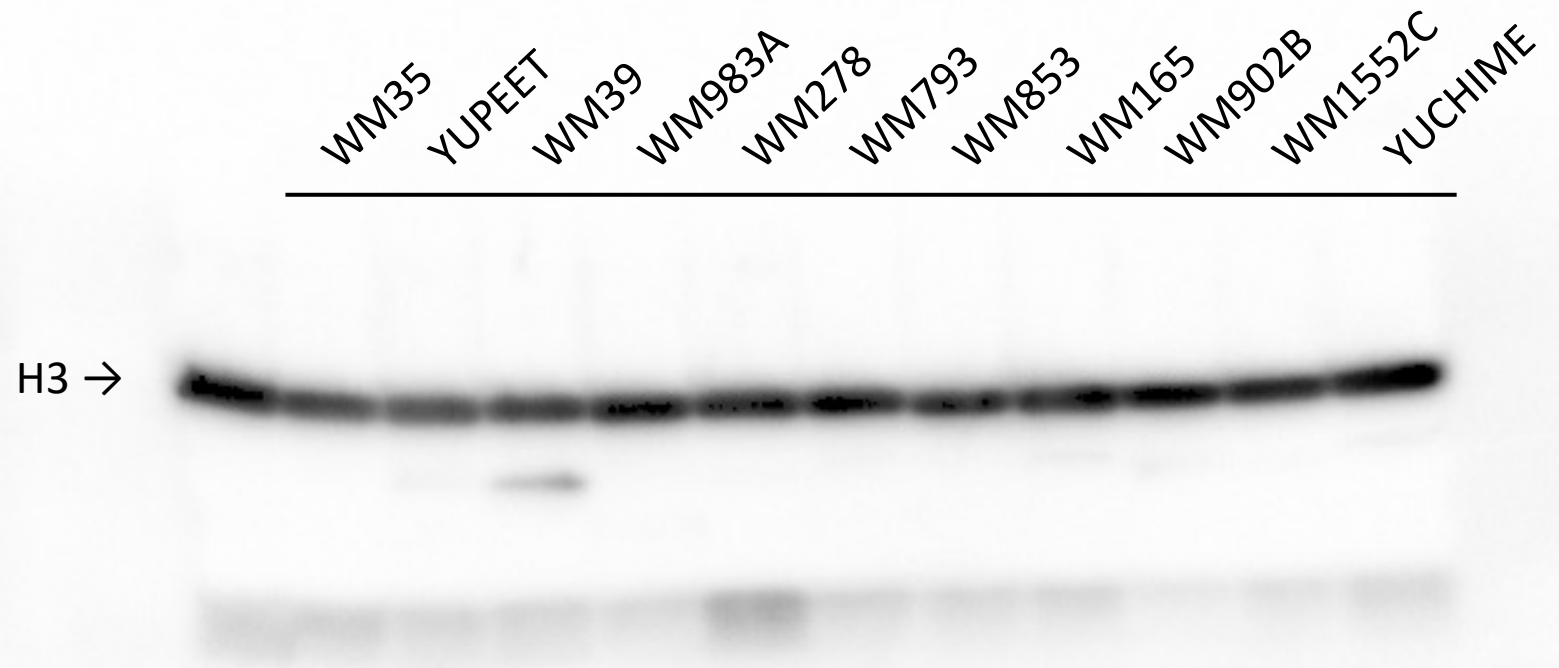

Supplement: jciinsight-9-166611-s219.pdf [file jciinsight-9-166611-s219.pdf]
